# Supplementary material for: Lipid alterations in chronic liver disease and liver cancer
Source: PubMed Central journal article supplement — JHEP Rep. 2022 Mar 26;4(6):100479. doi: 10.1016/j.jhepr.2022.100479 (PMC9034302; doi:10.1016/j.jhepr.2022.100479), 2022-03-26
Supplement: mmc1.pdf [file mmc1.pdf]

# Lipid alterations in chronic liver disease and liver cancer

Bichitra Paul, Monika Lewinska, Jesper B. Andersen

Table of contents

|                               |   |
|-------------------------------|---|
| Table S1.....                 | 2 |
| Supplementary references..... | 9 |

**Table S1. Therapeutic targets of interest in pre-malignant liver diseases (cancer prevention) and primary liver cancer (cancer treatment).**

| Pathway             | Target | CANCER PREVENTION   |                                              |       |                                                                             |                            | CANCER TREATMENT |                                          |         |                                                                                      |     |
|---------------------|--------|---------------------|----------------------------------------------|-------|-----------------------------------------------------------------------------|----------------------------|------------------|------------------------------------------|---------|--------------------------------------------------------------------------------------|-----|
|                     |        | Drug                | Setting                                      | Phase | Result                                                                      | Ref                        | Drug             | Setting                                  | Disease | Result                                                                               | Ref |
| De novo lipogenesis | ACC    | PF-05221304         | 305 NAFLD<br>350 NASH with Liver<br>Fibrosis | 2     | 44% reduction in hepatic steatosis                                          | NCT03248882<br>NCT04321031 | AICAR            | <i>In vitro</i> human hepatoma           | HCC     | Strong and cancer specific anti-growth effect                                        | 1,2 |
|                     |        | GS-0976 Firsocostat | Patients with NASH and fibrosis)             | 2     | Significant reduction in liver fat by 29%                                   | NTC03449446 <sup>3</sup>   | ND-654           | Male mice received oral dose of the drug | HCC     | Improved survival when either used alone or in combination with sorafenib            | 4   |
|                     |        |                     | 127 NAFLD                                    | 2     | 22% reduction of hepatic DNL decreased by 22%                               | NCT02856555 <sup>5</sup>   |                  |                                          |         |                                                                                      |     |
|                     |        |                     | Overweight males                             | 1     | Dose-dependent reduction of DNL was observed                                | NCT02876796 <sup>6</sup>   |                  |                                          |         |                                                                                      |     |
|                     |        | MK-4074             | 11 healthy volunteers and murine model       |       | Reduces hepatic steatosis but increases plasma triglycerides in mice        | 2                          |                  |                                          |         |                                                                                      |     |
|                     | FASN   | TVB-2640            | 142 NASH                                     | 2     | Reduced steatosis, improved biochemical, inflammatory, and fibrotic markers | NCT03938246 <sup>7</sup>   | Orlistat         | Cell models and murine models            | HCC     | antiproliferative efficacy HCC - most beneficial in AKT/mTOR related NAFLD-HCC cases | 8   |
|                     |        |                     | 330 NASH                                     | 2     | Recruiting                                                                  | NCT04906421                |                  | HCC cell line model                      | HCC     | Displays antitumor activity                                                          | 9   |
|                     |        |                     | 12 Obese Men                                 | 1/2   | Reduced hepatic DNL and decreased IHTG                                      | NCT02948569 <sup>10</sup>  | C75              | <i>In vitro</i> human HCC models         | HCC     | Growth arrest was seen which was partially modulated by p38 MAPK                     | 11  |

|                              |              |                                          |                                         |                                       |                                                           |                           |              |                                          |                               |                                                                                 |                                              |    |
|------------------------------|--------------|------------------------------------------|-----------------------------------------|---------------------------------------|-----------------------------------------------------------|---------------------------|--------------|------------------------------------------|-------------------------------|---------------------------------------------------------------------------------|----------------------------------------------|----|
|                              |              | Cerulenin                                | Ob/Ob mice – injected intraperitoneally |                                       | Hepatic function in ob/ob mice was significantly improved | 12                        | Triclosan    | <i>In vitro</i> hepatoma                 | HCC                           | The inhibitor successfully downregulated FASN expression                        | 13                                           |    |
|                              |              |                                          |                                         |                                       |                                                           |                           |              | HSC models                               | HCC                           | Reverted activated HSCs to a quiescent phenotype                                | 14                                           |    |
|                              |              |                                          |                                         |                                       |                                                           |                           |              | <i>In vitro</i> human hepatoma models    | HCC                           | The inhibitor has chemopreventative and anti-lipogenesis potential              | 15                                           |    |
|                              | SCD1         | Aramchol                                 | 60 participants with NAFLD              | 2                                     | Reduced steatosis NAFLD, improved metabolic fitness       | NCT01094158<br>16         | CAY10566     | Human HCC cells                          | HCC                           | Reduced viability, induced autophagy and apoptosis of human HCC cells           | 17                                           |    |
|                              |              | CAY10566                                 | HFD C57BL/6 mice                        |                                       | decreased hepatic steatosis                               | 18                        | CAY10566     | Human hepatoma (HepG2) cells             | HCC                           | decreased proliferation and survival in cells; decreased concentration of MUFAs | 19                                           |    |
|                              | TG synthesis | DGAT2                                    | PF-06865571                             | 350 NASH patients with Liver Fibrosis | 2                                                         | Recruiting                | NCT04321031  |                                          |                               |                                                                                 |                                              |    |
| PF-05221304                  |              |                                          | 99 NAFLD                                | 2                                     | 35% reduction in hepatic steatosis                        | NCT03776175 <sup>20</sup> |              |                                          |                               |                                                                                 |                                              |    |
| Fatty Acid                   | CPT1         | DGAT1                                    |                                         |                                       |                                                           |                           | Tussiligaone | <i>In vitro</i> human hepatoma cell line | HCC                           | Reduced triglyceride synthesis in the cell line                                 | 21                                           |    |
|                              |              |                                          |                                         |                                       |                                                           |                           |              | Sulfo-N-succinimidyl                     | Human liver cancer cell lines | HCC                                                                             | Migration rate was reduced in these cells    | 22 |
|                              |              |                                          |                                         |                                       |                                                           |                           |              | Etomoxir                                 | HFD and DEN-induced HCC       | HCC                                                                             | Ras-driven HCC was significantly ameliorated | 23 |
| Human hepatoma (HepG2) cells | HCC          | Oxidative stress was caused in the cells | 24                                      |                                       |                                                           |                           |              |                                          |                               |                                                                                 |                                              |    |
| FFA Uptake                   | CD36         |                                          |                                         |                                       |                                                           |                           |              |                                          |                               |                                                                                 |                                              |    |

|                            |      |                        |                                                                                            |   |                                                                                                                  |                           |             |                                                                       |     |                                                                                                        |    |
|----------------------------|------|------------------------|--------------------------------------------------------------------------------------------|---|------------------------------------------------------------------------------------------------------------------|---------------------------|-------------|-----------------------------------------------------------------------|-----|--------------------------------------------------------------------------------------------------------|----|
|                            |      |                        |                                                                                            |   |                                                                                                                  |                           |             | Xenograft nude mice injected with human hepatoma (HepG2) cells        | HCC | Etomoxir in combination with SOAT1 inhibitor significantly reduced tumour growth over 14 days          | 25 |
|                            |      |                        |                                                                                            |   |                                                                                                                  |                           |             | Mice with $\beta$ -catenin-activated HCC orally administered Etomoxir | HCC | 3 weeks administration with etomoxir dropped the tumour bearing rate to 3% compared to 12% in controls | 26 |
| Transcriptional regulation | PPAR | Lobeglitazone          | 38 participants Type 2 Diabetes NAFLD                                                      | 4 | Reduced steatosis, and improved glycemic, liver, and lipid profiles                                              | NCT02285205 <sup>27</sup> | Simvastatin | <i>In vitro</i> HCC cell lines                                        | HCC | Inhibited the HIF-1 $\alpha$ /PPAR- $\gamma$ /PKM2 axis and reduced proliferation in HCC cells         | 28 |
|                            |      | Pioglitazone           | 184 NAFLD patients with impaired glucose regulation (IGR) or T2DM with pioglitazone or BBR | 2 | A decrease in aminotransferase (ALT) values to within the normal range was observed in 7 (58.3%) of the patients | NCT00633282 <sup>29</sup> |             |                                                                       |     |                                                                                                        |    |
|                            |      | Saroglitazar           | 15 participants Liver Transplant; Complications NAFLD                                      | 2 | Recruiting                                                                                                       | NCT03639623               |             |                                                                       |     |                                                                                                        |    |
|                            |      | IWA337 (lanifibranor)  | 247 NASH                                                                                   | 2 | Liver enzyme levels decreased, levels of majority of lipid, inflammatory, fibrosis biomarkers improved           | NCT03008070 <sup>30</sup> |             |                                                                       |     |                                                                                                        |    |
|                            |      | IVA337                 | 2000 NASH                                                                                  | 3 | Recruiting                                                                                                       | NCT04849728               |             |                                                                       |     |                                                                                                        |    |
|                            |      | GFT505 (Elaftibrano r) | 270 NASH                                                                                   | 2 | Resolved NASH, improved patients' cardiometabolic risk profile.                                                  | NCT01694849 <sup>31</sup> |             |                                                                       |     |                                                                                                        |    |

|                  |                  |                 |                 |                                                                                                   |                                                                                               |                           |                                                        |                                  |                                                                                          |                                                                          |
|------------------|------------------|-----------------|-----------------|---------------------------------------------------------------------------------------------------|-----------------------------------------------------------------------------------------------|---------------------------|--------------------------------------------------------|----------------------------------|------------------------------------------------------------------------------------------|--------------------------------------------------------------------------|
| SREBP            | Fatostatin       | Zebrafish model | NA              | Highlights the importance of LXR $\alpha$ and SREBP1 in Cu-induced hepatic lipid deposition       | 32                                                                                            | Betulin                   | <i>In vitro</i> HCC cell lines                         | HCC                              | Helped to enhance the antitumor activity of Sorafenib by restricting glycolytic activity | 33                                                                       |
|                  | LXR              | Oltipraz        | 60 participants | 2                                                                                                 | Twenty-four-week treatment significantly reduced the liver fat content in patients with NAFLD | NCT01373554 <sup>34</sup> |                                                        |                                  |                                                                                          |                                                                          |
| 283 participants |                  |                 | 3               | No results published                                                                              | NCT02068339                                                                                   |                           |                                                        |                                  |                                                                                          |                                                                          |
| FXR              | Obeticholic acid | 283 NAFLD       | 2               | Improved the histological features of NASH                                                        | NCT01265498 <sup>35</sup>                                                                     | INT-767                   | Mice with oral administration of inhibitor in the diet | HCC                              | Tumour number and size were significantly reduced                                        | 36                                                                       |
|                  |                  | 70 NAFLD        | NA              | Recruiting                                                                                        | NCT03836937                                                                                   |                           | Obeticholic acid                                       | Primary mixed iCCA cell cultures | CCA                                                                                      | Decreased proliferation, induced apoptosis, decreased spheroid formation |
|                  | Px-104           | 12 NAFLD        | 2               | Improved insulin sensitivity and liver enzymes                                                    | NCT01999101 <sup>38</sup>                                                                     |                           |                                                        |                                  |                                                                                          |                                                                          |
|                  | LMB7-63          | 350 NASH        | 2               | Reduction of ALT, hepatic steatosis, weight and BMI                                               | NCT02855164                                                                                   |                           |                                                        |                                  |                                                                                          |                                                                          |
|                  | EYP0-01a         | 16 NASH         | 1               | No results published                                                                              | NCT03976687                                                                                   |                           |                                                        |                                  |                                                                                          |                                                                          |
|                  | MET409           | 120 NAFLD       | 2               | Reduced steatosis delivered                                                                       | NCT04702490 <sup>39</sup>                                                                     |                           |                                                        |                                  |                                                                                          |                                                                          |
|                  | TERN-101         | 101 NASH        | 2               | The overall safety, pharmacokinetics, and pharmacodynamics profiles of the inhibitor was assessed | NCT04328077 <sup>40</sup>                                                                     |                           |                                                        |                                  |                                                                                          |                                                                          |

|                  |       |                  |                                      |    |                                                                                                                                |                           |              |                                                                |                                                             |                             |             |
|------------------|-------|------------------|--------------------------------------|----|--------------------------------------------------------------------------------------------------------------------------------|---------------------------|--------------|----------------------------------------------------------------|-------------------------------------------------------------|-----------------------------|-------------|
| Sterol synthesis | HMCCR | Tropifexor       | 380 NASH                             | 2  | Recruiting                                                                                                                     | NCT04065841               |              |                                                                |                                                             |                             |             |
|                  |       | Obeticholic acid | 76 PSC                               | 2  | Reduced serum alkaline phosphatase                                                                                             | NCT02177136 <sup>41</sup> |              |                                                                |                                                             |                             |             |
|                  |       | EYP001a          | 11 chronic HBV infection             | 1  | No results published                                                                                                           | NCT03320616               |              |                                                                |                                                             |                             |             |
|                  |       | Cilofexor        | 419 non-cirrhotic adults with PSC    | 3  | Ongoing                                                                                                                        | NCT03890120               |              |                                                                |                                                             |                             |             |
|                  | HMCCR | Atorvastatin     | 84 NASH                              | 2  | LDLc in patients with NASH were mitigated with atorvastatin                                                                    | NCT02633956 <sup>42</sup> | Atorvastatin | 34 HCC patients on sorafenib                                   | HCC                                                         | Terminated (slow enrolment) | NCT03275376 |
|                  |       |                  | 150 NAFLD                            | NA | Withdrawn                                                                                                                      | NCT01987310               |              | 240 BCLC 0 HCC receiving complete ablation or tumour resection | HCC                                                         | Recruiting                  | NCT03024684 |
|                  |       |                  | 70 participants                      | 2  | Recruiting                                                                                                                     | NCT04679376               | 160 HCC      | HCC                                                            | Neither sorafenib nor pravastatin seemed to provide benefit | NCT01357486 <sup>43</sup>   |             |
|                  |       | Simvastatin      | 700 PSC                              | 3  | Recruiting                                                                                                                     | NCT04133792               | Pravastatin  | 474 patients with HCC                                          | HCC                                                         | No results published        | NCT01903694 |
|                  |       | Pitavastatin     | 50 overweight, insulin-resistant men | NA | Compared with placebo, pitavastatin did not affect hepatic or whole-body insulin sensitivity, and it did not reduce liver fat. | NCT02290106 <sup>44</sup> |              | 216 patients, advanced HCC                                     | HCC                                                         | No results published        | NCT01418729 |
|                  |       | Rosuvastatin     | 64 NAFLD                             | 4  | No results published                                                                                                           | NCT03434613               |              | 1 HCC patient                                                  | HCC                                                         | No results published        | NCT03219372 |
|                  |       |                  |                                      |    |                                                                                                                                |                           |              |                                                                |                                                             |                             |             |

|                         |           |                    |                                                                          |   |                                                                                                                                   |                           |            |                                                                               |     |                                                                                   |                           |  |
|-------------------------|-----------|--------------------|--------------------------------------------------------------------------|---|-----------------------------------------------------------------------------------------------------------------------------------|---------------------------|------------|-------------------------------------------------------------------------------|-----|-----------------------------------------------------------------------------------|---------------------------|--|
| Sphingolipid metabolism | ASBT/IBAT | Volixibat / SHP626 | 200 participants having itching associated with PSC                      | 2 | Recruiting                                                                                                                        | NCT04663308               | Statin     | 350 participants, patients who received liver transplant as treatment for HCC | HCC | No results published                                                              | NCT03490461               |  |
|                         |           |                    | 197 participants with more than 5 % steatosis and NASH without cirrhosis | 2 | Terminated as the inhibitor did not meet the interim endpoint, and due to diarrhea being the most common side effects in patients | NCT02787304 <sup>46</sup> | Statin     | 3 participants                                                                | HCC | No results published                                                              | NCT02819869               |  |
|                         |           |                    | 84 overweight and obese adults                                           | 1 | Initial success in improvement of the patients' conditions                                                                        | NCT02287779 <sup>47</sup> | Bamnet-UD2 | Subcutaneous injection into nude mice                                         | CCA | Tumour growth inhibition in cells expressing ASBT more efficiently than cisplatin | 45                        |  |
|                         |           |                    |                                                                          |   |                                                                                                                                   |                           |            |                                                                               |     |                                                                                   |                           |  |
|                         | SK2       | K145               | Intraperitoneal injection to ob/ob mice                                  |   | Reduced steatosis and liver function recovery                                                                                     | 48                        | ABC294640  | 21 solid tumour patients (1 CCA)                                              | CCA | Partial response at 250 mg qd                                                     | NCT01488513 <sup>49</sup> |  |
|                         |           |                    |                                                                          |   |                                                                                                                                   |                           |            | 105 participants with CCA                                                     | CCA | Ongoing                                                                           | NCT03377179               |  |
|                         |           |                    |                                                                          |   |                                                                                                                                   |                           |            | Human CCA cells                                                               | CCA | Inhibited proliferation and caspase-dependent apoptosis in CCA cells              | 50                        |  |
|                         |           |                    |                                                                          |   |                                                                                                                                   |                           |            | Human CCA cells                                                               | CCA | Inhibits CCA cell growth                                                          | 51                        |  |

|       |                       |                                                          |  |                                         |    |                       |                                                                |     |                                                                                 |                               |
|-------|-----------------------|----------------------------------------------------------|--|-----------------------------------------|----|-----------------------|----------------------------------------------------------------|-----|---------------------------------------------------------------------------------|-------------------------------|
|       |                       |                                                          |  |                                         |    |                       | Mouse xenograft models                                         | HCC | Decrease in S1P levels in mice after treatment for 5 weeks                      | 52                            |
| S1P1R | FTY720/<br>fingolimod | Oral administration to diet-induced mouse model of NAFLD |  | Reduced steatosis, liver TGs, ceramides | 53 | FTY720/<br>fingolimod | HCC-bearing rats subjected to orthotopic liver transplantation | HCC | Tumour recurrence was suppressed, and survival increased significantly          | 54                            |
| SK1   |                       |                                                          |  |                                         |    | Icaritin              | <i>In vitro</i> HCC cell lines, xenograft SCID mice            | HCC | Potent antitumor activity <i>in vitro</i> , inhibition of tumour growth in mice | NCT2820<br>6952 <sup>55</sup> |



## Supplementary references

1. Jose C, Hebert-Chatelain E, Bellance N, Larendra A, Su M, Nouette-Gaulain K, et al. AICAR inhibits cancer cell growth and triggers cell-type distinct effects on OXPHOS biogenesis, oxidative stress and Akt activation. *Biochim Biophys Acta*. 2011;1807:707-718.
2. Kim CW, Addy C, Kusunoki J, Anderson NN, Deja S, Fu X, et al. Acetyl CoA Carboxylase Inhibition Reduces Hepatic Steatosis but Elevates Plasma Triglycerides in Mice and Humans: A Bedside to Bench Investigation. *Cell Metab*. 2017;26:394-406 e396.
3. Alkhouri N, Lawitz E, Noureddin M, DeFronzo R, Shulman GI. GS-0976 (Firsocostat): an investigational liver-directed acetyl-CoA carboxylase (ACC) inhibitor for the treatment of non-alcoholic steatohepatitis (NASH). *Expert Opin Investig Drugs*. 2020;29:135-141.
4. Lally JSV, Ghoshal S, DePeralta DK, Moaven O, Wei L, Masia R, et al. Inhibition of Acetyl-CoA Carboxylase by Phosphorylation or the Inhibitor ND-654 Suppresses Lipogenesis and Hepatocellular Carcinoma. *Cell Metab*. 2019;29:174-182 e175.
5. Lawitz EJ, Coste A, Poordad F, Alkhouri N, Loo N, McColgan BJ, et al. Acetyl-CoA Carboxylase Inhibitor GS-0976 for 12 Weeks Reduces Hepatic De Novo Lipogenesis and Steatosis in Patients With Nonalcoholic Steatohepatitis. *Clin Gastroenterol Hepatol*. 2018;16:1983-1991 e1983.
6. Stiede K, Miao W, Blanchette HS, Beysen C, Harriman G, Harwood HJ, Jr., et al. Acetyl-coenzyme A carboxylase inhibition reduces de novo lipogenesis in overweight male subjects: A randomized, double-blind, crossover study. *Hepatology*. 2017;66:324-334.
7. Loomba R, Mohseni R, Lucas KJ, Gutierrez JA, Perry RG, Trotter JF, et al. TVB-2640 (FASN Inhibitor) for the Treatment of Nonalcoholic Steatohepatitis: FASCINATE-1, a Randomized, Placebo-Controlled Phase 2a Trial. *Gastroenterology*. 2021;161:1475-1486.
8. Zhang C, Sheng L, Yuan M, Hu J, Meng Y, Wu Y, et al. Orlistat delays hepatocarcinogenesis in mice with hepatic co-activation of AKT and c-Met. *Toxicol Appl Pharmacol*. 2020;392:114918.
9. You BJ, Chen LY, Hsu PH, Sung PH, Hung YC, Lee HZ. Orlistat Displays Antitumor Activity and Enhances the Efficacy of Paclitaxel in Human Hepatoma Hep3B Cells. *Chem Res Toxicol*. 2019;32:255-264.
10. Syed-Abdul MM, Parks EJ, Gaballah AH, Bingham K, Hammoud GM, Kemble G, et al. Fatty Acid Synthase Inhibitor TVB-2640 Reduces Hepatic de Novo Lipogenesis in Males With Metabolic Abnormalities. *Hepatology*. 2020;72:103-118.
11. Gao Y, Lin LP, Zhu CH, Chen Y, Hou YT, Ding J. Growth arrest induced by C75, A fatty acid synthase inhibitor, was partially modulated by p38 MAPK but not by p53 in human hepatocellular carcinoma. *Cancer Biol Ther*. 2006;5:978-985.
12. Cheng G, Palanisamy AP, Evans ZP, Sutter AG, Jin L, Singh I, et al. Cerulenin blockade of fatty acid synthase reverses hepatic steatosis in ob/ob mice. *PLoS One*. 2013;8:e75980.
13. Sun D, Zhao T, Long K, Wu M, Zhang Z. Triclosan down-regulates fatty acid synthase through microRNAs in HepG2 cells. *Eur J Pharmacol*. 2021;907:174261.
14. Miranda JF, Scarinci LD, Ramos LF, Silva CM, Goncalves LR, de Moraes PF, et al. The modulatory effect of triclosan on the reversion of the activated phenotype of LX-2 hepatic stellate cells. *J Biochem Mol Toxicol*. 2020;34:e22413.

15. Huang CH, Tsai SJ, Wang YJ, Pan MH, Kao JY, Way TD. EGCG inhibits protein synthesis, lipogenesis, and cell cycle progression through activation of AMPK in p53 positive and negative human hepatoma cells. *Mol Nutr Food Res.* 2009;53:1156-1165.
16. Safadi R, Konikoff FM, Mahamid M, Zelber-Sagi S, Halpern M, Gilat T, et al. The fatty acid-bile acid conjugate Aramchol reduces liver fat content in patients with nonalcoholic fatty liver disease. *Clin Gastroenterol Hepatol.* 2014;12:2085-2091 e2081.
17. Huang GM, Jiang QH, Cai C, Qu M, Shen W. SCD1 negatively regulates autophagy-induced cell death in human hepatocellular carcinoma through inactivation of the AMPK signaling pathway. *Cancer Lett.* 2015;358:180-190.
18. Zhou Y, Zhong L, Yu S, Shen W, Cai C, Yu H. Inhibition of stearyl-coenzyme A desaturase 1 ameliorates hepatic steatosis by inducing AMPK-mediated lipophagy. *Aging (Albany NY).* 2020;12:7350-7362.
19. de Lima Luna AC, Forti FL. Modulation of SCD1 activity in hepatocyte cell lines: evaluation of genomic stability and proliferation. *Mol Cell Biochem.* 2021.
20. Calle RA, Amin NB, Carvajal-Gonzalez S, Ross TT, Bergman A, Aggarwal S, et al. ACC inhibitor alone or co-administered with a DGAT2 inhibitor in patients with non-alcoholic fatty liver disease: two parallel, placebo-controlled, randomized phase 2a trials. *Nat Med.* 2021;27:1836-1848.
21. Park HR, Yoo MY, Seo JH, Kim IS, Kim NY, Kang JY, et al. Sesquiterpenoids isolated from the flower buds of *Tussilago farfara* L. inhibit diacylglycerol acyltransferase. *J Agric Food Chem.* 2008;56:10493-10497.
22. Nath A, Li I, Roberts LR, Chan C. Elevated free fatty acid uptake via CD36 promotes epithelial-mesenchymal transition in hepatocellular carcinoma. *Sci Rep.* 2015;5:14752.
23. Xu A, Wang B, Fu J, Qin W, Yu T, Yang Z, et al. Diet-induced hepatic steatosis activates Ras to promote hepatocarcinogenesis via CPT1alpha. *Cancer Lett.* 2019;442:40-52.
24. Merrill CL, Ni H, Yoon LW, Tirmenstein MA, Narayanan P, Benavides GR, et al. Etomoxir-induced oxidative stress in HepG2 cells detected by differential gene expression is confirmed biochemically. *Toxicol Sci.* 2002;68:93-101.
25. Ren M, Xu H, Xia H, Tang Q, Bi F. Simultaneously targeting SOAT1 and CPT1A ameliorates hepatocellular carcinoma by disrupting lipid homeostasis. *Cell Death Discov.* 2021;7:125.
26. Senni N, Savall M, Cabrerizo Granados D, Alves-Guerra MC, Sartor C, Lagoutte I, et al. beta-catenin-activated hepatocellular carcinomas are addicted to fatty acids. *Gut.* 2019;68:322-334.
27. Lee YH, Kim JH, Kim SR, Jin HY, Rhee EJ, Cho YM, et al. Lobeglitazone, a Novel Thiazolidinedione, Improves Non-Alcoholic Fatty Liver Disease in Type 2 Diabetes: Its Efficacy and Predictive Factors Related to Responsiveness. *J Korean Med Sci.* 2017;32:60-69.
28. Feng J, Dai W, Mao Y, Wu L, Li J, Chen K, et al. Simvastatin re-sensitizes hepatocellular carcinoma cells to sorafenib by inhibiting HIF-1alpha/PPAR-gamma/PKM2-mediated glycolysis. *J Exp Clin Cancer Res.* 2020;39:24.
29. Yoneda M, Endo H, Nozaki Y, Tomimoto A, Fujisawa T, Fujita K, et al. Life style-related diseases of the digestive system: gene expression in nonalcoholic steatohepatitis patients and treatment strategies. *J Pharmacol Sci.* 2007;105:151-156.
30. Francque SM, Bedossa P, Ratziu V, Anstee QM, Bugianesi E, Sanyal AJ, et al. A Randomized, Controlled Trial of the Pan-PPAR Agonist Lanifibranor in NASH. *N Engl J Med.* 2021;385:1547-1558.

31. Ratziu V, Harrison SA, Francque S, Bedossa P, Lehert P, Serfaty L, et al. Elafibranor, an Agonist of the Peroxisome Proliferator-Activated Receptor-alpha and -delta, Induces Resolution of Nonalcoholic Steatohepatitis Without Fibrosis Worsening. *Gastroenterology*. 2016;150:1147-1159 e1145.
32. Pan YX, Zhuo MQ, Li DD, Xu YH, Wu K, Luo Z. SREBP-1 and LXRA pathways mediated Cu-induced hepatic lipid metabolism in zebrafish *Danio rerio*. *Chemosphere*. 2019;215:370-379.
33. Yin F, Feng F, Wang L, Wang X, Li Z, Cao Y. SREBP-1 inhibitor Betulin enhances the antitumor effect of Sorafenib on hepatocellular carcinoma via restricting cellular glycolytic activity. *Cell Death Dis*. 2019;10:672.
34. Kim W, Kim BG, Lee JS, Lee CK, Yeon JE, Chang MS, et al. Randomised clinical trial: the efficacy and safety of oltipraz, a liver X receptor alpha-inhibitory dithiolethione in patients with non-alcoholic fatty liver disease. *Aliment Pharmacol Ther*. 2017;45:1073-1083.
35. Neuschwander-Tetri BA, Loomba R, Sanyal AJ, Lavine JE, Van Natta ML, Abdelmalek MF, et al. Farnesoid X nuclear receptor ligand obeticholic acid for non-cirrhotic, non-alcoholic steatohepatitis (FLINT): a multicentre, randomised, placebo-controlled trial. *Lancet*. 2015;385:956-965.
36. Cariello M, Peres C, Zerlotin R, Porru E, Sabba C, Roda A, et al. Long-term Administration of Nuclear Bile Acid Receptor FXR Agonist Prevents Spontaneous Hepatocarcinogenesis in *Abcb4(-/-)* Mice. *Sci Rep*. 2017;7:11203.
37. Di Matteo S, Nevi L, Costantini D, Overi D, Carpino G, Safarikia S, et al. The FXR agonist obeticholic acid inhibits the cancerogenic potential of human cholangiocarcinoma. *PLoS One*. 2019;14:e0210077.
38. Traussnigg S, Halilbasic E, Hofer H, Munda P, Stojakovic T, Fauler G, et al. Open-label phase II study evaluating safety and efficacy of the non-steroidal farnesoid X receptor agonist PX-104 in non-alcoholic fatty liver disease. *Wien Klin Wochenschr*. 2021;133:441-451.
39. Harrison SA, Bashir MR, Lee KJ, Shim-Lopez J, Lee J, Wagner B, et al. A structurally optimized FXR agonist, MET409, reduced liver fat content over 12 weeks in patients with non-alcoholic steatohepatitis. *J Hepatol*. 2021;75:25-33.
40. Wang Y, Crittenden DB, Eng C, Zhang Q, Guo P, Chung D, et al. Safety, Pharmacokinetics, Pharmacodynamics, and Formulation of Liver-Distributed Farnesoid X-Receptor Agonist TERN-101 in Healthy Volunteers. *Clin Pharmacol Drug Dev*. 2021;10:1198-1208.
41. Kowdley KV, Vuppalanchi R, Levy C, Floreani A, Andreone P, LaRusso NF, et al. A randomized, placebo-controlled, phase II study of obeticholic acid for primary sclerosing cholangitis. *J Hepatol*. 2020;73:94-101.
42. Pockros PJ, Fuchs M, Freilich B, Schiff E, Kohli A, Lawitz EJ, et al. CONTROL: A randomized phase 2 study of obeticholic acid and atorvastatin on lipoproteins in nonalcoholic steatohepatitis patients. *Liver Int*. 2019;39:2082-2093.
43. Blanc JF, Khemissa F, Bronowicki JP, Montereymard C, Perarnau JM, Bourgeois V, et al. Phase 2 trial comparing sorafenib, pravastatin, their combination or supportive care in HCC with Child-Pugh B cirrhosis. *Hepatol Int*. 2021;15:93-104.
44. Braun LR, Feldpausch MN, Czerwonka N, Weiss J, Branch K, Lee H, et al. Effects of Pitavastatin on Insulin Sensitivity and Liver Fat: A Randomized Clinical Trial. *J Clin Endocrinol Metab*. 2018;103:4176-4186.
45. Lozano E, Monte MJ, Briz O, Hernandez-Hernandez A, Banales JM, Marin JJ, et al. Enhanced antitumour drug delivery to cholangiocarcinoma through the apical sodium-dependent bile acid transporter (ASBT). *J Control Release*. 2015;216:93-102.

46. Newsome PN, Palmer M, Freilich B, Sheikh MY, Sheikh A, Sarles H, et al. Volixibat in adults with non-alcoholic steatohepatitis: 24-week interim analysis from a randomized, phase II study. *J Hepatol.* 2020;73:231-240.
47. Palmer M, Jennings L, Silberg DG, Bliss C, Martin P. A randomised, double-blind, placebo-controlled phase 1 study of the safety, tolerability and pharmacodynamics of volixibat in overweight and obese but otherwise healthy adults: implications for treatment of non-alcoholic steatohepatitis. *BMC Pharmacol Toxicol.* 2018;19:10.
48. Shi Y, Wei Q, Liu Y, Yuan J. The alleviating effect of sphingosine kinases 2 inhibitor K145 on nonalcoholic fatty liver. *Biochem Biophys Res Commun.* 2021;580:1-6.
49. Britten CD, Garrett-Mayer E, Chin SH, Shirai K, Ogretmen B, Bentz TA, et al. A Phase I Study of ABC294640, a First-in-Class Sphingosine Kinase-2 Inhibitor, in Patients with Advanced Solid Tumors. *Clin Cancer Res.* 2017;23:4642-4650.
50. Ding X, Chaiteerakij R, Moser CD, Shaleh H, Boakye J, Chen G, et al. Antitumor effect of the novel sphingosine kinase 2 inhibitor ABC294640 is enhanced by inhibition of autophagy and by sorafenib in human cholangiocarcinoma cells. *Oncotarget.* 2016;7:20080-20092.
51. Ding X, Zhang Y, Huang T, Xu G, Peng C, Chen G, et al. Targeting sphingosine kinase 2 suppresses cell growth and synergizes with BCL2/BCL-XL inhibitors through NOXA-mediated MCL1 degradation in cholangiocarcinoma. *Am J Cancer Res.* 2019;9:546-561.
52. Beljanski V, Lewis CS, Smith CD. Antitumor activity of sphingosine kinase 2 inhibitor ABC294640 and sorafenib in hepatocellular carcinoma xenografts. *Cancer Biol Ther.* 2011;11:524-534.
53. Rohrbach TD, Asgharpour A, Maczys MA, Montefusco D, Cowart LA, Bedossa P, et al. FTY720/fingolimod decreases hepatic steatosis and expression of fatty acid synthase in diet-induced nonalcoholic fatty liver disease in mice. *J Lipid Res.* 2019;60:1311-1322.
54. Ushitora Y, Tashiro H, Ogawa T, Tanimoto Y, Kuroda S, Kobayashi T, et al. Suppression of hepatocellular carcinoma recurrence after rat liver transplantation by FTY720, a sphingosine-1-phosphate analog. *Transplantation.* 2009;88:980-986.
55. Lu PH, Chen MB, Liu YY, Wu MH, Li WT, Wei MX, et al. Identification of sphingosine kinase 1 (SphK1) as a primary target of icaritin in hepatocellular carcinoma cells. *Oncotarget.* 2017;8:22800-22810.
